# Supplementary material for: Dual Nucleosomal Double-Strand Breaks Are the Key Effectors of Curative Radiation Therapy
Source: MDPI journal article supplement (doi:10.3390/biophysica3040045), 2023-12-14
Supplement: s1 [file s1]

# **Dual Nucleosomal Double Strand Breaks are the Key Effectors of Curative Radiation Therapy: Supplement 1**

**Anders Brahme <sup>1 \*</sup> and Yvonne Lorat <sup>2</sup>**

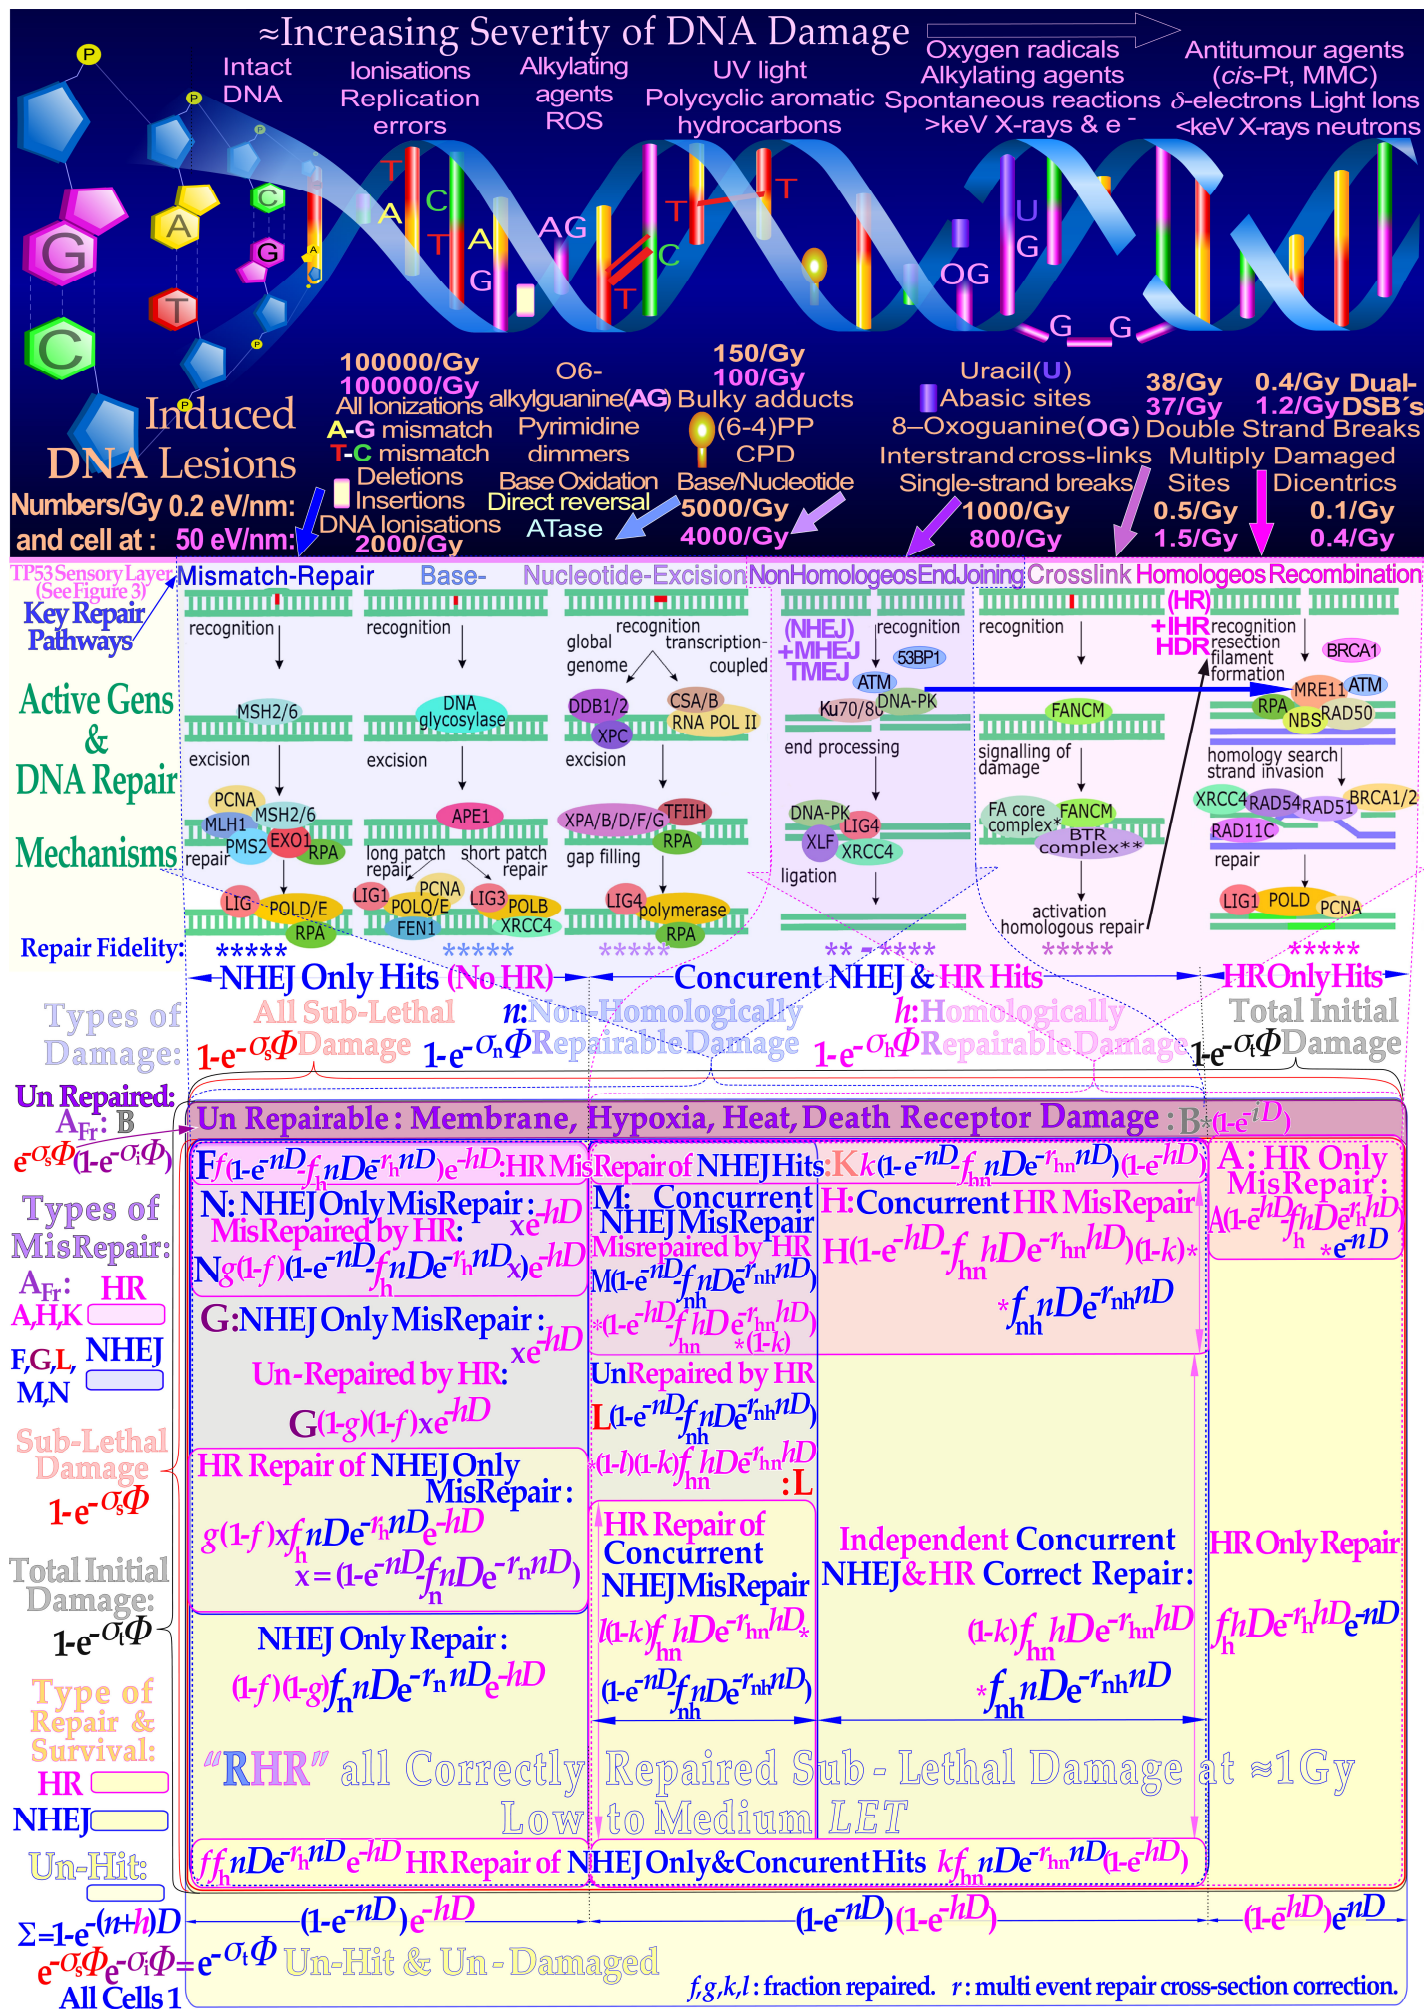

**Supplement 1.** Different parts of the DNA damage spectrum induce a number of associated repair pathways that determine the possibility of the cell repairing its DNA and recovering from the damage. The current theory, for simplicity, split the damage and repair into two main groups, depending on whether it was mild and easily and rapidly repaired or more complex, requiring the application of the slower high fidelity Homologous Recombination (HR) machinery. This HR contribution is needed to clear possible misrepaired DSBs likely to be produced by nonhomologous end joining (NHEJ) at local high doses or *LETs*. The non-homologically repairable damage includes plain NHEJ and all the mechanisms to the left of it in the lower half of the figure. The TP53 sensory layer between damage and repair is shown in more detail in Figure 3a describing the wide range of sensory proteins and cellular response mechanisms (Figure 2a developed from [1, 9, 33, 34]). The speed of the Ku-DNApk heterodimer complex and TP53 recruitment to a DNA DSB, a few seconds, makes it the most likely starting point of all DSBs absolutely necessary not to lose the right order in which the DNA ends belong together (horizontal blue arrow NHEJ->HR “switch” when p53 senses repair problems as in Figure 10 [1, 4, 9, 17, 27]). There are also a number of other connections between NHEJ and HR as indicated previously such as that HR assists if a key NHEJ repair gene is knocked out and vice versa and HR may clear some NHEJ misrepair [1, 9, 27]. The two main groups of DNA damage: non-homologically-repairable damage (*n*) and the group requiring the homologues recombination (HR) machinery (*h*). A single cell can have one or the other or both *n*- and *h*-type damage resulting in different probabilities of repair (yellow) and misrepair (upper shaded areas, cf Eq 1-9). Interestingly, the new repair formulation is consistent with a fair probability of HR repair of NHEJ only and concurrent misrepair. The capital A-N are the fraction of each misrepair process that may lead to apoptosis; see [1, 17, 27] for further details.
